# Supplementary material for: Left Ventricular Systolic Dysfunction in Asymptomatic Marfan Syndrome Patients Is Related to the Severity of Gene Mutation: Insights from the Novel Three Dimensional Speckle Tracking Echocardiography
Source: PLOS journal article supplement (doi:10.1371/journal.pone.0124112), 2015-04-22
Supplement: S1 (10.1371/journal.pone.0124112.s001) [file journal.pone.0124112.s001]

Archive with 2 entries (2 files):
- refs.MYD
- refs.FRM
